# Supplementary material
Source: MDPI journal article supplement (https://www.mdpi.com/2073-4352/9/2/116)
Supplement: s1 [file s1]

## Supporting Information

### **Solvent effects on the spin crossover properties of iron(II) imidazolylimine complexes**

Darunee Sertphon<sup>1</sup>, Phimpaka Harding<sup>1</sup>, Keith S. Murray<sup>2</sup>, Boujemaa Moubaraki<sup>2</sup>,  
Suzanne M. Neville<sup>3</sup>, Lujia Liu,<sup>4</sup> Shane G. Telfer<sup>4</sup> and David J. Harding<sup>1\*</sup>

<sup>1</sup> Functional Materials and Nanotechnology Center of Excellence, Walailak University,  
Thasala, Nakhon Si Thammarat, 80160, Thailand

<sup>2</sup> School of Chemistry, Monash University, Clayton, Victoria, 3800, Australia

<sup>3</sup> School of Chemistry, University of New South Wales, Sydney, NSW, 2052, Australia

<sup>4</sup> MacDiarmid Institute for Advanced Materials and Nanotechnology, Institute of  
Fundamental Sciences, Massey University, Palmerston North, New Zealand

E-mail: [hdavid@mail.wu.ac.th](mailto:hdavid@mail.wu.ac.th)

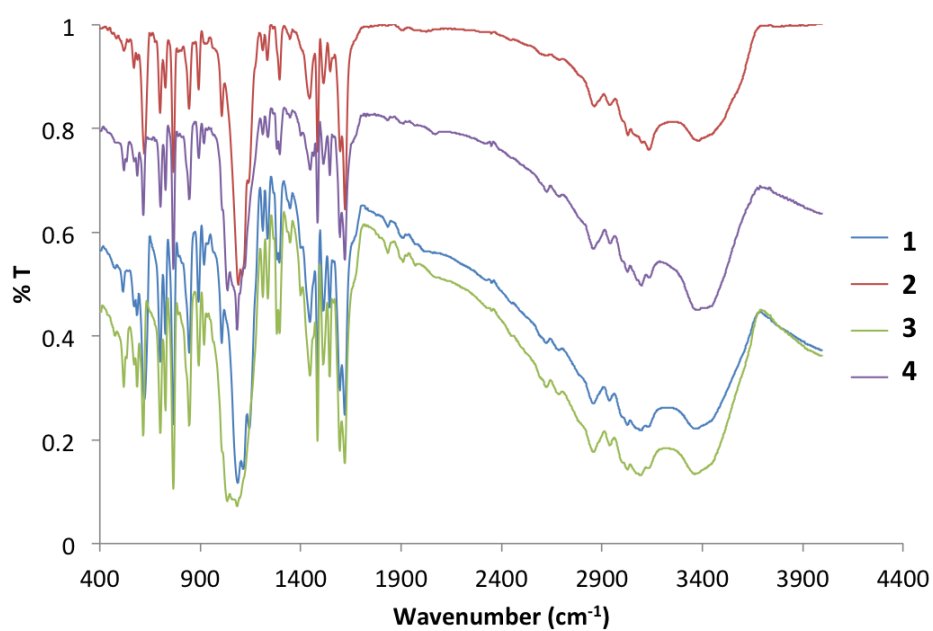

**Figure S1** IR spectra of **1- 4**.

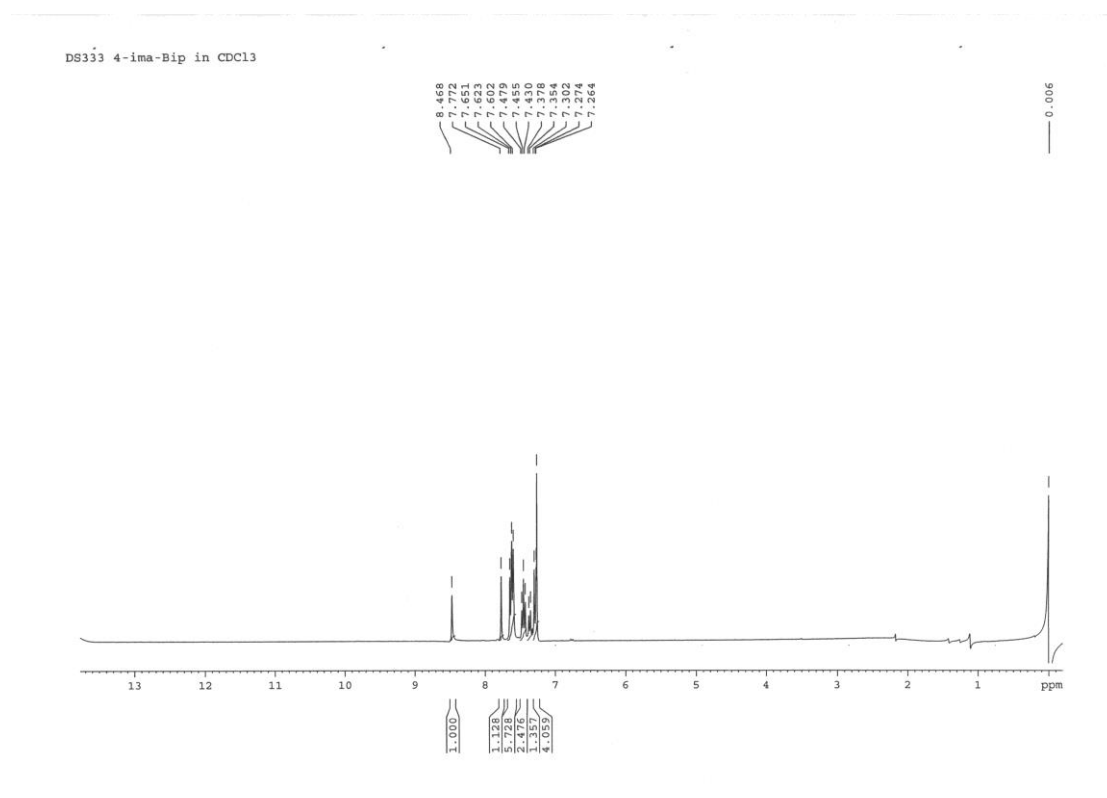

**Figure S2**  $^1\text{H}$ -NMR spectrum of 4-ima-Bp.

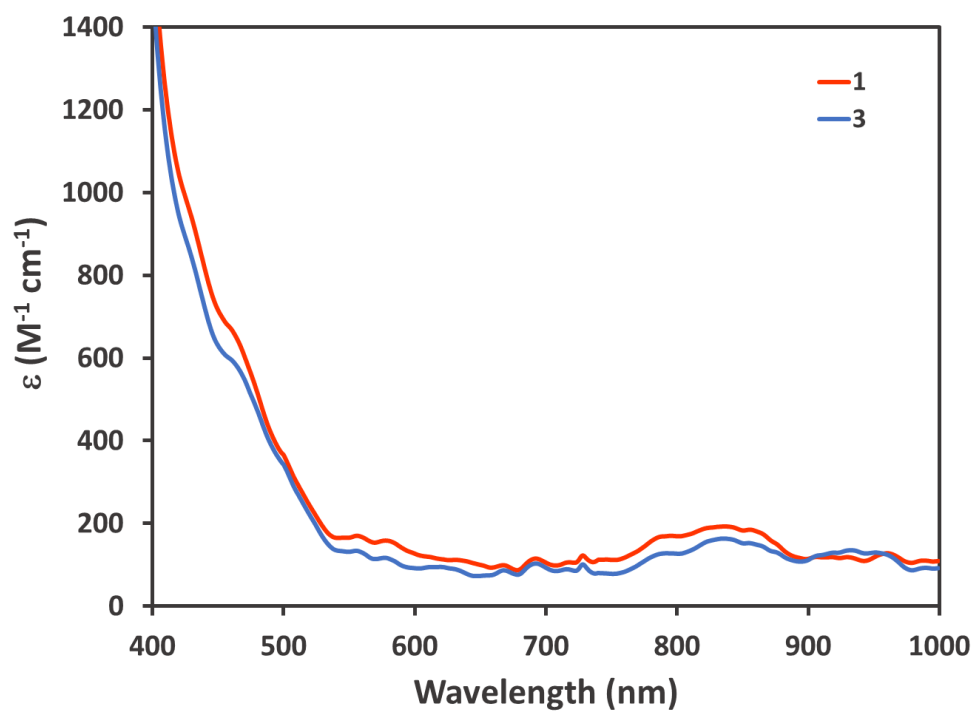

**Figure S3** UV-Vis of  $[\text{Fe}(\text{4-ima-Bp})_3](\text{ClO}_4)_2$  **1** and  $[\text{Fe}(\text{4-ima-Bp})_3](\text{BF}_4)_2$  **3** in MeCN in a 0.1 M solution.

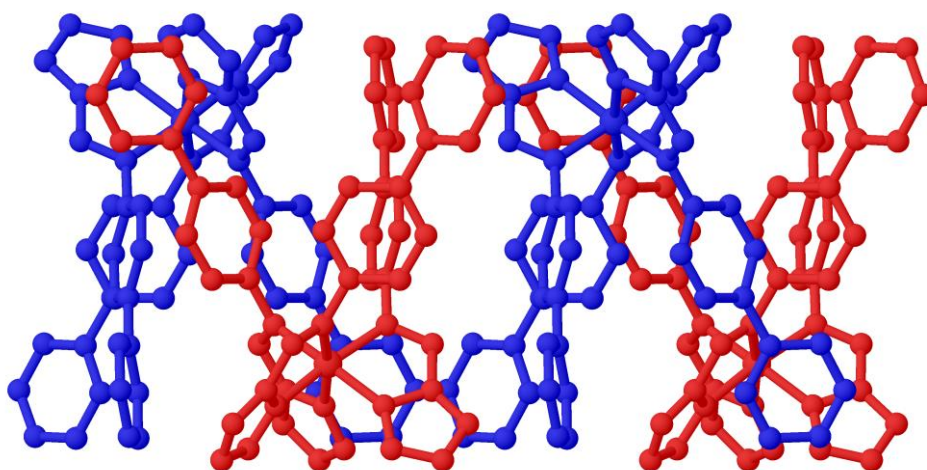

**Figure S4** Side-on view of the packing in *fac*- $[\text{Fe}(\text{4-ima-Bp})_3](\text{ClO}_4)_2 \cdot 3\text{MeOH}$  **2**.

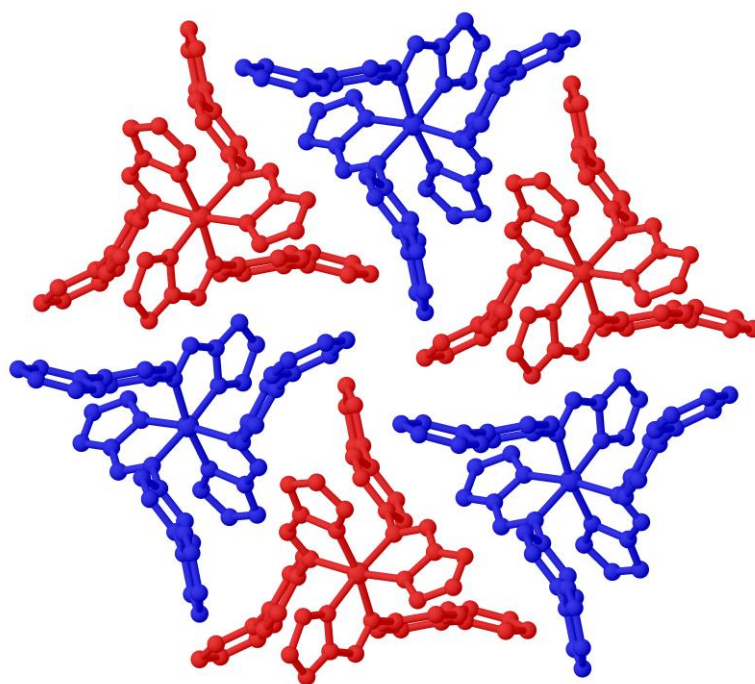

**Figure S5** View of the *pseudo*-hexagonal packing motif in *fac*-[Fe(4-ima-Bp)<sub>3</sub>](BF<sub>4</sub>)<sub>2</sub>·3.5MeCN **5**.

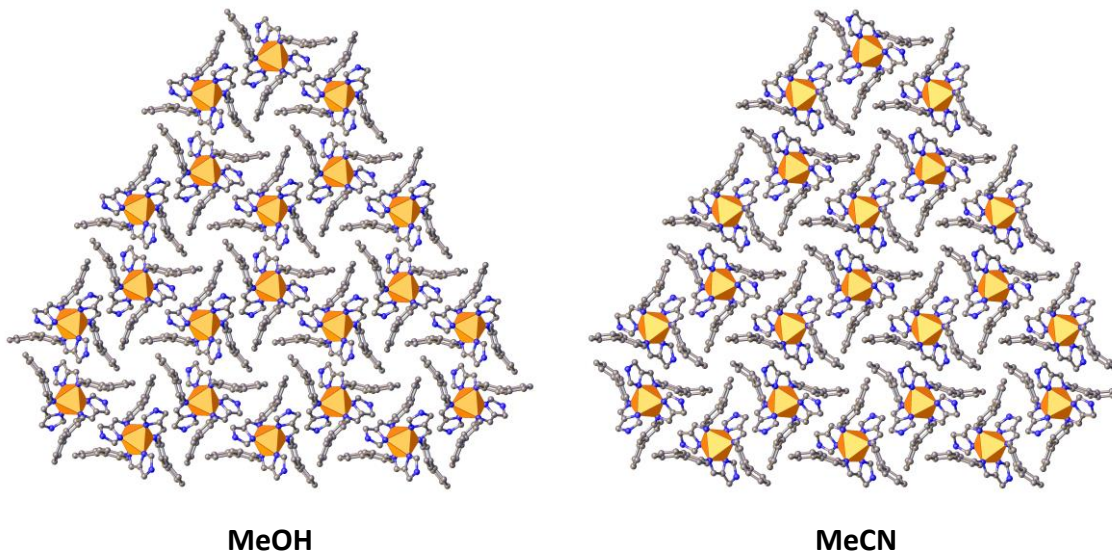

**Figure S6** Comparative view of the hexagonal and *pseudo*-hexagonal packing motifs found in **2** and **5**.

**Table S1** Geometric parameters of C-H $\cdots\pi$  and  $\pi$ - $\pi$  interactions in **1-2** and **5**.

| Complex  |                               | Type                  | Distance |
|----------|-------------------------------|-----------------------|----------|
| <b>1</b> | C10-H10 $\cdots\pi$ (C5-C10)  | <i>Intramolecular</i> | 2.681 Å  |
|          | C7-H7 $\cdots\pi$ (C5-C10)    | <i>Intermolecular</i> | 2.689 Å  |
|          | C13-H13 $\cdots\pi$ (C11-C16) | <i>Intermolecular</i> | 2.905 Å  |
| <b>2</b> | C10-H10 $\cdots\pi$ (C5-C10)  | <i>Intramolecular</i> | 2.635 Å  |
|          | C7-H7 $\cdots\pi$ (C5-C10)    | <i>Intermolecular</i> | 2.630 Å  |
|          | C13-H13 $\cdots\pi$ (C11-C16) | <i>Intermolecular</i> | 2.808 Å  |
| <b>5</b> | C42-H42 $\cdots\pi$ (C5-C10)  | <i>Intramolecular</i> | 2.654 Å  |
|          | C10-H10 $\cdots\pi$ (C21-C26) | <i>Intramolecular</i> | 2.561 Å  |
|          | C22-H22 $\cdots\pi$ (C37-C42) | <i>Intramolecular</i> | 2.657 Å  |
|          | C25-H25 $\cdots\pi$ (C5-C10)  | <i>Intermolecular</i> | 2.716 Å  |
|          | C39-H39 $\cdots\pi$ (C21-C26) | <i>Intermolecular</i> | 2.776 Å  |
|          | C45-H45 $\cdots\pi$ (C11-C16) | <i>Intermolecular</i> | 3.055 Å  |
|          | $\pi$ - $\pi$                 | -                     | 3.690 Å  |

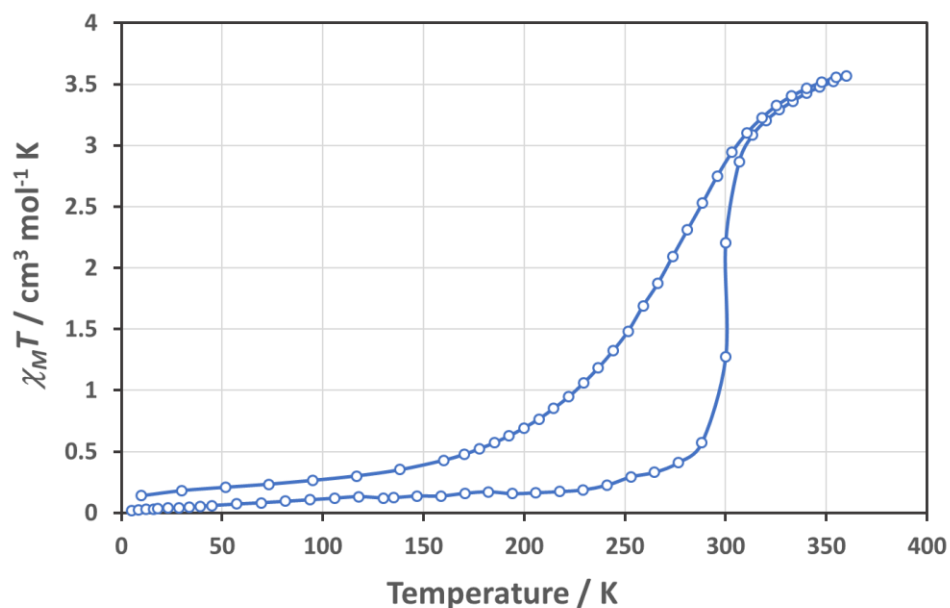

**Figure S7** SQUID profile of *fac*-[Fe(4-ima-Bp)<sub>3</sub>](ClO<sub>4</sub>)<sub>2</sub>·3EtOH **1**.

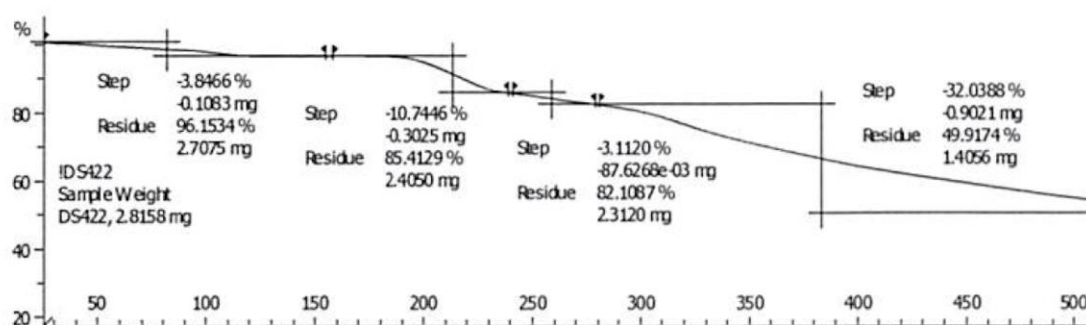

**Figure S8** TGA of *fac*-[Fe(4-ima-Bp)<sub>3</sub>](ClO<sub>4</sub>)<sub>2</sub>·3EtOH **1**.

The first mass loss of 3.85% occurs at *ca.* 80 °C and is consistent with one equivalent of EtOH (calculated 4.06%). The second mass loss of 10.74% occurs at *ca.* 210 °C and is broadly suggestive of loss of the two remaining EtOH molecules (calculated 8.12%).
